# Supplementary material for: The role of nutritional factors in transitioning between early, mid, and late stages of age-related macular degeneration: prospective longitudinal analysis
Source: PubMed Central journal article supplement — Am J Clin Nutr. 2024 Aug 23;120(6):1387–98. doi: 10.1016/j.ajcnut.2024.08.019 (PMC11619796; doi:10.1016/j.ajcnut.2024.08.019), 2024-08-23
Supplement: mmc1.pdf [file mmc1.pdf]

**The Role of Nutritional Factors in Transitioning between Early, Mid and Late Stages of Age-Related Macular Degeneration: prospective longitudinal analysis**

Johanna M. Seddon<sup>\*</sup>, Dikha De, Bernard Rosner

**\*Corresponding author:**

Johanna M. Seddon, M.D., ScM  
Dept. Ophthalmology and Visual Sciences  
University of Massachusetts Medical School  
55 N Lake Ave, Worcester, MA 01655  
Email: [johanna\\_seddon@yahoo.com](mailto:johanna_seddon@yahoo.com)

**SUPPLEMENTAL TABLE 1.** Comparison of AREDS severity scales/groups at baseline and severity scales/groups at 5 years using the eye as the unit of analysis <sup>a</sup> for Analytical Dataset (N=2697 eyes) <sup>a</sup>

|          |                         | AT 5 YEARS           |                      |                 |                |                 |                      |                 |                 |                |                              |             | Total |
|----------|-------------------------|----------------------|----------------------|-----------------|----------------|-----------------|----------------------|-----------------|-----------------|----------------|------------------------------|-------------|-------|
|          |                         | AMD Severity Group 1 | AMD Severity Group 2 |                 |                |                 | AMD Severity Group 3 |                 |                 |                | AMD Severity Group 4 (Row %) |             |       |
|          |                         | AREDS Severity Scale |                      |                 |                |                 |                      |                 |                 |                |                              |             |       |
| BASELINE | AREDS Severity Scale    | 1                    | 2                    | 3               | 4              | 5               | 6                    | 7               | 8               | 9-12           |                              |             |       |
|          | AMD Severity Group 2    | 2                    | 177                  | 236             | 57             | 101             | 36                   | 16              | 6               | 7              | 7 (1)                        | <b>643</b>  |       |
|          |                         | 3                    | 16                   | 58              | 55             | 67              | 38                   | 18              | 6               | 1              | 7 (3)                        | <b>266</b>  |       |
|          |                         | 4                    | 18                   | 58              | 27             | 106             | 116                  | 88              | 27              | 23             | 33 (7)                       | <b>496</b>  |       |
|          | AMD Severity Group 3    | 5                    | 2                    | 7               | 8              | 57              | 59                   | 86              | 42              | 12             | 37 (12)                      | <b>310</b>  |       |
|          |                         | 6                    | 1                    | 3               | 4              | 13              | 39                   | 106             | 97              | 58             | 88 (22)                      | <b>409</b>  |       |
|          |                         | 7                    | 0                    | 0               | 1              | 7               | 12                   | 34              | 77              | 94             | 189 (46)                     | <b>414</b>  |       |
|          |                         | 8                    | 0                    | 1               | 0              | 2               | 6                    | 10              | 19              | 23             | 98 (62)                      | <b>159</b>  |       |
|          | <b>Total (Column %)</b> |                      | <b>214 (8)</b>       | <b>363 (13)</b> | <b>152 (6)</b> | <b>353 (13)</b> | <b>306 (11)</b>      | <b>358 (13)</b> | <b>274 (10)</b> | <b>218 (8)</b> | <b>459 (17)</b>              | <b>2697</b> |       |

AAMD = advanced age-related macular degeneration; AMD = age-related macular degeneration;  
 AREDS = Age-Related Eye Disease Study

<sup>a</sup> Does not account for confirmation across 2 visits.

**SUPPLEMENTAL TABLE 2.** Change in AREDS severity scale from baseline to 5 years for complete AREDS dataset (N=5433 eyes)

| <b>AREDS Severity Scale at Baseline</b> | <b>Decreased (%)<sup>a</sup></b> | <b>Remained the Same (%)<sup>a</sup></b> | <b>Transitioned to higher non-advanced stages (%)<sup>a b</sup></b> | <b>Progressed to AAMD (%)<sup>a b</sup></b> | <b>TOTAL</b> |
|-----------------------------------------|----------------------------------|------------------------------------------|---------------------------------------------------------------------|---------------------------------------------|--------------|
| <b>1</b>                                | 0 (0)                            | 1870 (80)                                | 448 (19)                                                            | 16 (1)                                      | <b>2334</b>  |
| <b>2</b>                                | 208 (28)                         | 259 (35)                                 | 263 (36)                                                            | 10 (1)                                      | <b>740</b>   |
| <b>3</b>                                | 83 (26)                          | 65 (21)                                  | 158 (50)                                                            | 8 (3)                                       | <b>314</b>   |
| <b>4</b>                                | 119 (21)                         | 152 (27)                                 | 260 (46)                                                            | 37 (7)                                      | <b>568</b>   |
| <b>5</b>                                | 80 (22)                          | 64 (18)                                  | 162 (45)                                                            | 53 (15)                                     | <b>359</b>   |
| <b>6</b>                                | 62 (14)                          | 114 (25)                                 | 181 (40)                                                            | 99 (22)                                     | <b>456</b>   |
| <b>7</b>                                | 66 (14)                          | 91 (19)                                  | 110 (23)                                                            | 209 (44)                                    | <b>476</b>   |
| <b>8</b>                                | 46 (25)                          | 31 (17)                                  | 0 (0)                                                               | 109 (59)                                    | <b>186</b>   |
| <b>Total</b>                            | <b>664 (12)</b>                  | <b>2646 (49)</b>                         | <b>1582 (29)</b>                                                    | <b>541 (10)</b>                             | <b>5433</b>  |

AAMD = Advanced Age-related Macular Degeneration; AREDS = Age-Related Eye Disease Study

<sup>a</sup> All percentages are row %

<sup>b</sup> Does not account for confirmation across 2 visits.

**SUPPLEMENTAL TABLE 3.** Comparison of AREDS severity scales/groups at baseline and severity scales/groups at 5 years using the eye as the unit of analysis for complete AREDS dataset (N=5433 eyes) <sup>a</sup>

|                 |                             |                      | AT 5 YEARS                      |                      |                 |                |                      |                |                |                |                              |                 |             |
|-----------------|-----------------------------|----------------------|---------------------------------|----------------------|-----------------|----------------|----------------------|----------------|----------------|----------------|------------------------------|-----------------|-------------|
|                 |                             |                      | AMD Severity Group 1            | AMD Severity Group 2 |                 |                | AMD Severity Group 3 |                |                |                | AMD Severity Group 4 (Row %) | Total           |             |
|                 |                             |                      | AREDS Severity Scale at 5 Years |                      |                 |                |                      |                |                |                |                              |                 |             |
|                 |                             | AREDS Severity Scale | 1                               | 2                    | 3               | 4              | 5                    | 6              | 7              | 8              | 9-12                         |                 |             |
| <b>BASELINE</b> | <b>AMD Severity Group 1</b> | <b>1</b>             | 1870                            | 273                  | 64              | 78             | 13                   | 17             | 0              | 3              | 16 (1)                       | <b>2334</b>     |             |
|                 | <b>AMD Severity Group 2</b> | <b>2</b>             | 208                             | 259                  | 69              | 117            | 42                   | 20             | 7              | 8              | 10 (1)                       | <b>740</b>      |             |
|                 |                             | <b>3</b>             | 18                              | 65                   | 65              | 78             | 46                   | 25             | 8              | 1              | 8 (3)                        | <b>314</b>      |             |
|                 |                             | <b>4</b>             | 19                              | 67                   | 33              | 152            | 108                  | 95             | 30             | 27             | 37 (7)                       | <b>568</b>      |             |
|                 | <b>AMD Severity Group 3</b> | <b>5</b>             | 2                               | 8                    | 11              | 59             | 64                   | 92             | 52             | 18             | 53 (15)                      | <b>359</b>      |             |
|                 |                             | <b>6</b>             | 1                               | 3                    | 4               | 15             | 39                   | 114            | 107            | 74             | 99 (22)                      | <b>456</b>      |             |
|                 |                             | <b>7</b>             | 0                               | 0                    | 1               | 8              | 13                   | 44             | 91             | 110            | 209 (44)                     | <b>476</b>      |             |
|                 |                             | <b>8</b>             | 0                               | 1                    | 0               | 1              | 9                    | 12             | 23             | 31             | 109 (59)                     | <b>186</b>      |             |
|                 | <b>Total (Column %)</b>     |                      |                                 | <b>2118 (39)</b>     | <b>676 (12)</b> | <b>247 (4)</b> | <b>508 (9)</b>       | <b>334 (6)</b> | <b>419 (8)</b> | <b>318 (6)</b> | <b>272 (5)</b>               | <b>541 (10)</b> | <b>5433</b> |

AAMD = advanced age-related macular degeneration; AMD = age-related macular degeneration; AREDS = Age-Related Eye Disease Study

<sup>a</sup>Does not account for confirmation across 2 visits.
